# Supplementary material for: Surface plasmon resonance biosensor chips integrated with MoS2–MoO3 hybrid microflowers for rapid CFP-10 tuberculosis detection
Source: Royal Society of Chemistry journal article supplement (doi:10.1039/d3tb01327h), 2023-01-01
Supplement: d3tb01327h1.pdf [file d3tb01327h1.pdf]

## **Electronic Supplementary Information**

### **Surface Plasmon Resonance Biosensor Chip Integrated with MoS<sub>2</sub>-MoO<sub>3</sub> Hybrid Microflowers for Rapid CFP-10 Tuberculosis Detection**

*Chandra Wulandari<sup>1,2,3</sup>, Ni Luh Wulan Septiani<sup>2,4,5</sup>, Gilang Gumilar<sup>2,3</sup>, Ahmad Nuruddin<sup>2</sup>, Nugraha<sup>2,5</sup>, Muhammad Iqbal<sup>2</sup>, Hutomo Suryo Wasisto<sup>6</sup>, and Brian Yuliarto<sup>2,5,7,\*</sup>*

<sup>1</sup> *Doctoral Program of Engineering Physics, Faculty of Industrial Technology, Institut Teknologi Bandung, Ganesha 10, Bandung 40132, Indonesia*

<sup>2</sup> *Advanced Functional Material Research Group, Faculty of Industrial Technology, Institut Teknologi Bandung, Jl. Ganesha No. 10, Bandung 41032, Indonesia*

<sup>3</sup> *PT Biostark Analitika Inovasi, Bandung 40375, Indonesia*

<sup>4</sup> *Research Center for Advanced Materials, National Research, and Innovation Agency (BRIN), Kawasan Puspiptek, South Tangerang 15134, Indonesia.*

<sup>5</sup> *BRIN and ITB Collaboration Research Center for Biosensor and Biodevices, Institut Teknologi Bandung, Bandung 40132, Indonesia*

<sup>6</sup> *PT Nanosense Instrument Indonesia, Umbulharjo, Yogyakarta 55167, Indonesia*

<sup>7</sup> *Research Center for Nanosciences and Nanotechnology (RCNN), Institut Teknologi Bandung, Jl. Ganesha No. 10, Bandung 41032, Indonesia*

\*Email: [brian@itb.ac.id](mailto:brian@itb.ac.id)

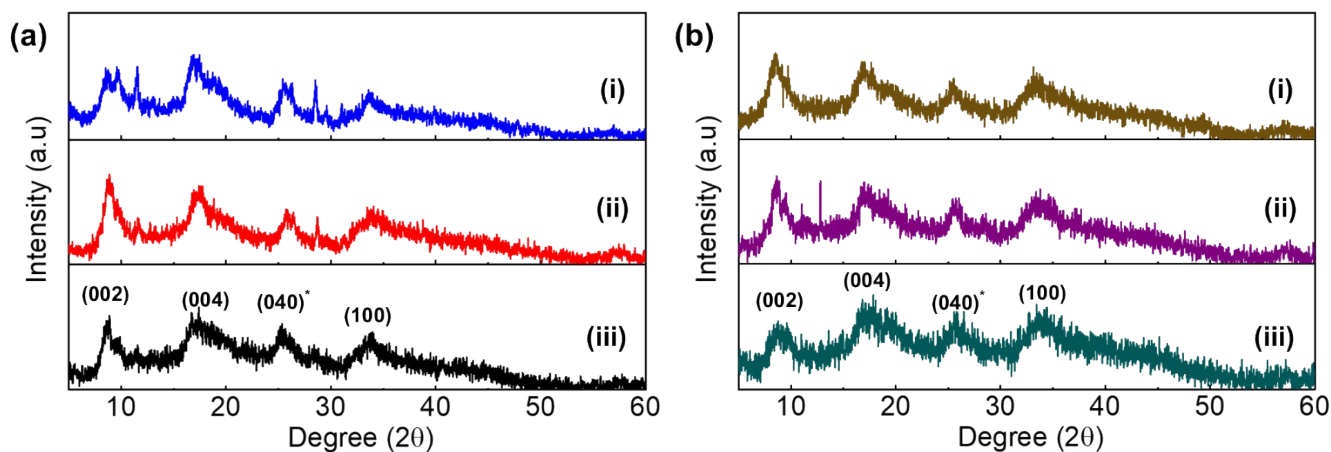

**Fig. S1.** (a) The X-ray diffraction (XRD) spectra of synthesized MoS<sub>2</sub>-MoO<sub>3</sub> with (a) pH of 8 (i), 7 (ii), and 6 (iii), and (b) Na<sub>3</sub>Ct variation of 0.5 g (i), 0.25 g (ii), and 0.125 g (iii). The XRD patterns exhibit MoS<sub>2</sub> crystal structure with the presence of MoO<sub>3</sub> (marked by asterisk sign).

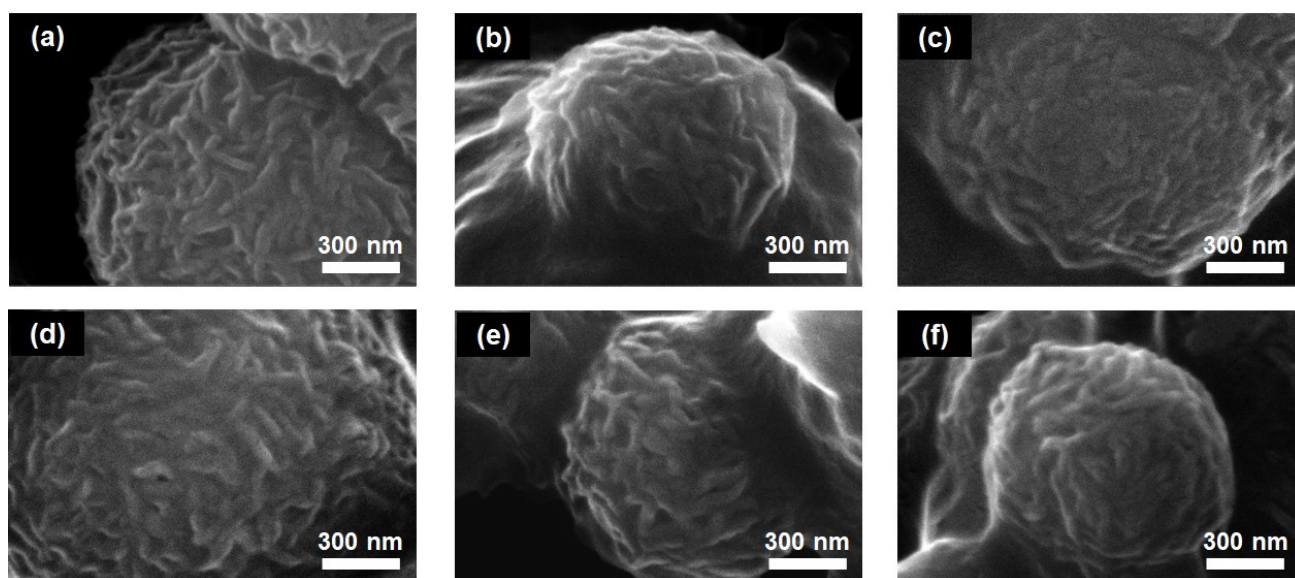

**Fig. S2.** High-magnification scanning electron microscopy (SEM) images of synthesized MoS<sub>2</sub>-MoO<sub>3</sub> at (a) pH 6; (b) pH 7; (c) pH 8; and synthesized MoS<sub>2</sub>-MoO<sub>3</sub> at pH 7 with Na<sub>3</sub>Ct addition of (d) 0.125 g; (e) 0.25 g; and (f) 0.5 g.

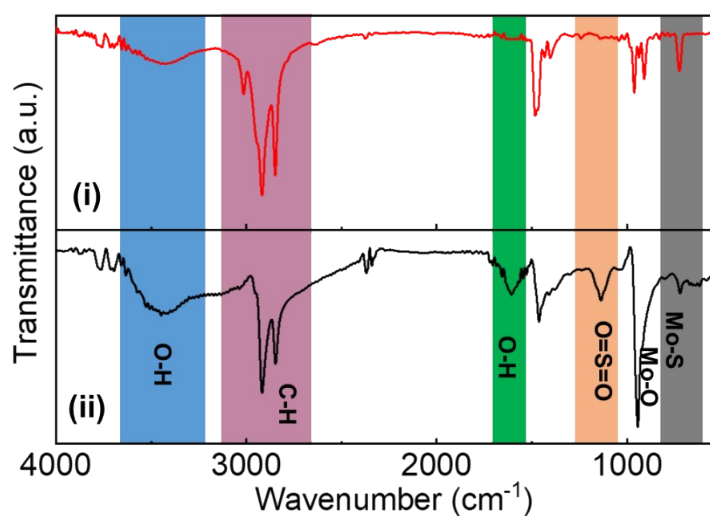

**Fig. S3.** The Fourier transform infrared spectroscopy (FTIR) spectra of (i) cetyltrimethylammonium bromide (CTAB) and (ii) MoS<sub>2</sub>-MoO<sub>3</sub> with 0.5 g of Na<sub>3</sub>Ct.

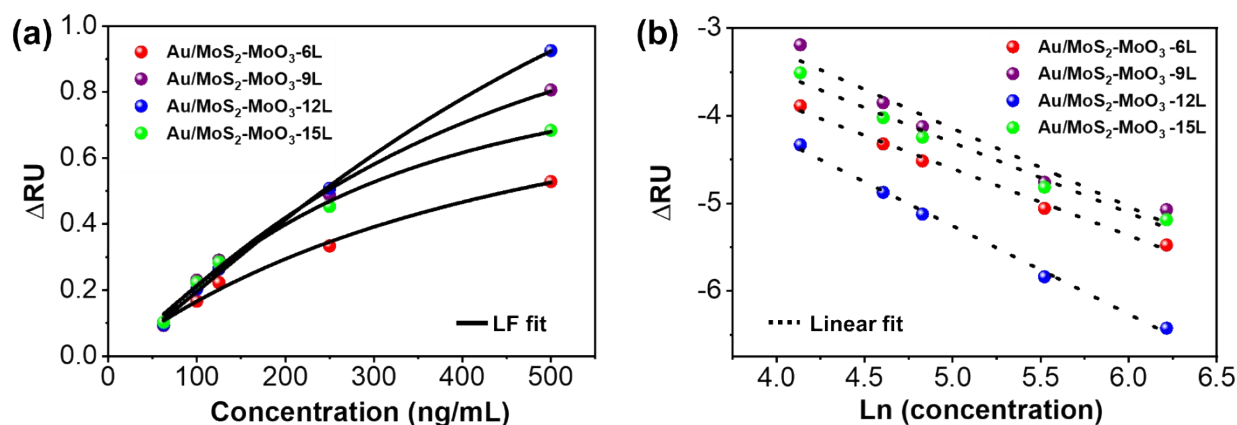

**Fig. S4.** (a) The CFP-10 concentration vs.  $\Delta RU$  with LF fit curve and (b) linear regression of  $\ln(k_{LF}/\Delta RU)$  vs.  $\ln(C)$  for four different Au/MoS<sub>2</sub>-MoO<sub>3</sub> sensors (i.e., 6L, 9L, 12L, and 15L).

**Table S1.** The parameters obtained from the linear regression  $\ln(k_{LF}/\Delta RU)$  vs.  $\ln(C)$ , resulting in sensitivity and LOD of the biosensors.

| Chip                                      | Parameters                                    |       |             |                     |
|-------------------------------------------|-----------------------------------------------|-------|-------------|---------------------|
|                                           | Linear equation                               | $R^2$ | Sensitivity | LOD (S/N = 3) ng/mL |
| Au/MoS <sub>2</sub> -MoO <sub>3</sub> 6L  | $C) = -0.7620 \ln(k_{LF}/\Delta RU) - 0.7944$ | 0.997 | 0.7620      | 6.5523              |
| Au/MoS <sub>2</sub> -MoO <sub>3</sub> 9L  | $C) = -0.8875 \ln(k_{LF}/\Delta RU) - 0.2641$ | 0.996 | 0.8875      | 3.9423              |
| Au/MoS <sub>2</sub> -MoO <sub>3</sub> 12L | $C) = -1.0059 \ln(k_{LF}/\Delta RU) - 0.2130$ | 0.998 | 1.0059      | 3.4473              |
| Au/MoS <sub>2</sub> -MoO <sub>3</sub> 15L | $C) = -0.8062 \ln(k_{LF}/\Delta RU) - 0.2026$ | 0.994 | 0.8062      | 5.7604              |

**Table S2.** The performance comparison of several tuberculosis (TB) biosensors having different detection techniques and target analytes.

| Detection technique | Target analyte | Material                                                    | Assay time | Detection range   | LOD         | Ref.             |
|---------------------|----------------|-------------------------------------------------------------|------------|-------------------|-------------|------------------|
| ELISA               | ESAT-6         | -                                                           | >3 h       | 47 – 3000 ng/mL   | 179 ng/mL   | 1                |
| ELISA               | ESAT-6         | Au nanoparticles                                            |            | 47 – 3000 ng/mL   | 23.95 ng/mL | 1                |
| Electrochemical     | CFP-10         | Graphene/polyaniline-modified screen-printed gold electrode | 3 h        | 20 – 100 ng/mL    | 15 ng/mL    | 2                |
| Electrochemical     | ESAT-6         | dithiobissuccinimidyl propionate-modified electrode         | -          | 10 – 50,000 ng/mL | 7 ng/mL     | 3                |
| SPR                 | CFP-10         | Au                                                          | 30 min     | 100 – 1000 ng/mL  | 100 ng/mL   | 4                |
| SPR                 | Ag85 protein   | Au                                                          | -          | 10 – 1000 ng/mL   | 10 ng/mL    | 5                |
| SPR                 | CFP-10         | Au/MoS <sub>2</sub> -MoO <sub>3</sub>                       | 12 min     | 62.5 – 500 ng/mL  | 3.45 ng/mL  | <b>This work</b> |

**Reference:**

- 1 S. Gupta and V. Kakkar, *Tuberculosis*, 2019, **118**, 101852.
- 2 U. Z. M. Azmi, N. A. Yusof, N. Kusnin, J. Abdullah, S. Suraiya, P. S. Ong, N. H. A. Raston, S. F. A. Rahman and M. F. M. Fathil, *Sensors* 2018, *Vol. 18*, Page 3926, 2018, **18**, 3926.
- 3 M. F. Diouani, O. Ouerghi, A. Refai, K. Belgacem, C. Tlili, D. Laouini and M. Essafi, *Mater. Sci. Eng. C. Mater. Biol. Appl.*, 2017, **74**, 465–470.
- 4 S. C. Hong, J. Lee, H. C. Shin, C. M. Kim, J. Y. Park, K. Koh, H. J. Kim, C. L. Chang and J. Lee, *Sensors Actuators B Chem.*, 2011, **160**, 1434–1438.
- 5 M. Trzaskowski, A. Napiórkowska, E. Augustynowicz-Kopeć and T. Ciach, *Sensors Actuators, B Chem.*, 2018, **260**, 786–792.
